1  
2  
3  
4  
5  
6  
7  
8  
9  
10  
11  
12  
13  
14  
15  
16  
17  
18  
19  
20  
21  
22

**Major QTL controls adaptation to serpentine soils in *Mimulus guttatus***

Jessica P. Selby<sup>1,\*</sup> and John H. Willis<sup>1</sup>

<sup>1</sup>Department of Biology, Duke University, Durham, North Carolina, USA

\* Corresponding author: [jessica.selby@duke.edu](mailto:jessica.selby@duke.edu)

23  
24  
25  
26  
27  
28  
29  
30  
31  
32  
33  
34  
35  
36  
37  
38  
39  
40  
41  
42  
43  
44  
45  
46  
47  
48  
49  
50  
51

## ABSTRACT

Spatially varying selection is a critical driver of adaptive differentiation. Yet, there are few examples where the fitness effects of naturally segregating variants that contribute to local adaptation have been measured in the field. This project investigates the genetic basis of adaptation to serpentine soils in *Mimulus guttatus*. Reciprocal transplant studies show that serpentine and non-serpentine populations of *M. guttatus* are genetically differentiated in their ability to survive on serpentine soils. We mapped serpentine tolerance by performing a bulk segregant analysis on F2 survivors from a field transplant study and identify a single QTL where individuals that are homozygous for the non-serpentine allele do not survive on serpentine soils. This same QTL controls serpentine tolerance in a second, geographically distant population. A common garden study where the two serpentine populations were grown on each other's soil finds that one of the populations has significantly lower survival on this "foreign" serpentine soil compared to its home soil. So, while these two populations share a major QTL they either differ at other loci involved in serpentine adaptation or have different causal alleles at this QTL. This raises the possibility that serpentine populations may not be broadly tolerant to serpentine soils but may instead be locally adapted to their particular patch. Nevertheless, despite the myriad chemical and physical challenges that plants face in serpentine habitats, adaptation to these soils in *M. guttatus* has a simple genetic basis.

**Keywords:** adaptation, QTL mapping, bulk segregant, reciprocal transplant, serpentine soils, *Mimulus*

52

## INTRODUCTION

53           Natural landscapes are highly heterogeneous, resulting in selective pressures that differ  
54 between habitats. Such divergent selection can maintain genetic variation (Gillespie & Turelli,  
55 1989; Levene, 1953), drive population differentiation (Felsenstein, 1976; Hedrick, 1986; Hedrick  
56 *et al.*, 1976) and ultimately promote speciation (Schluter & Conte, 2009). Some of the most  
57 striking examples of the power of natural selection to shape biological diversity involve  
58 adaptation of plants to extreme soil environments such as mine tailings, saline, acidic and  
59 serpentine soils (Brady *et al.*, 2005; Linhart & Grant, 1996; Mark R. Macnair, 1993; Rajakaruna,  
60 2018). Evolutionary ecologists have studied plant adaptation to harsh soils for decades,  
61 providing some of the best examples of evolution in action (Linhart & Grant, 1996). Classic  
62 studies on plant adaptation to mine tailings demonstrated that plants can be locally adapted  
63 over a scale of meters despite substantial gene flow (Antonovics & Bradshaw, 1970; Jain &  
64 Bradshaw, 1966; McNeilly, 1968) and that local adaptation can lead to reproductive isolation (M.  
65 R. Macnair & Christie, 1983; McNeilly & Antonovics, 1968).

66           Transitions between soil habitats are often abrupt resulting in discrete habitat types with  
67 strongly divergent selective pressures. Large effect alleles may be more likely to be favored in  
68 such situations where populations are colonizing new habitats in which they are initially far  
69 from the fitness optimum (reviewed Dittmar *et al.*, 2016; Orr, 1998). Major genes have often been  
70 found for traits involved in adaptation to anthropogenic selection pressures such as industrial  
71 melanism (van't Hof, 2011), warfarin resistance (Kohn, 2000) and insecticide resistance  
72 (Hemingway, 2004). These cases represent instances where selection is hard and individuals

73 that lack appropriate genetic variation cannot survive. If individuals need a large phenotypic  
74 change to survive and reproduce this may favor the fixation of major genes (Mark R. Macnair,  
75 1991). In addition, because distinct soil habitats often occur in close proximity if populations are  
76 locally adapted, this differentiation has likely evolved in the face of gene flow. Recent  
77 theoretical work shows that successful adaptation across discrete environments occurs either  
78 via few, large effect mutations or many small ones (Gilbert & Whitlock, 2017) and that selection  
79 for local adaptation with gene flow can lead to the clustering of multiple, linked loci (Yeaman &  
80 Otto, 2011; Yeaman & Whitlock, 2011). A number of recent QTL studies on metal tolerance and  
81 hyperaccumulation in plants growing in heavy metal contaminated soils suggests that  
82 adaptation to these stressful edaphic habitats may have a relatively simple genetic basis (e.g.  
83 cadmium and zinc tolerance in *Arabidopsis halleri* (Courbot *et al.*, 2007; Willems *et al.*, 2007) and  
84 *Thlaspi caerulescens* (Deniau *et al.*, 2006); nickel tolerance in the serpentine endemic *Caulanthus*  
85 *amplexicaulis* (Burrell *et al.*, 2012) and serpentine populations of *Silene vulgaris* (Bratteler *et al.*,  
86 2006); and copper tolerance in populations of *Mimulus guttatus* (K. M. Wright *et al.*, 2013)).  
87 However, most of these QTL studies were conducted in lab-based conditions, often using  
88 hydroponic culture to isolate a single soil chemical variable thought to be important for  
89 adaptation. There are very few studies that have actually tested the fitness effects of loci that  
90 contribute to edaphic specialization in the field (but see Lexer *et al.*, 2003; K. M. Wright *et al.*,  
91 2015) so we know little about the genetic architecture of adaptation to these habitats.

92           Serpentine soils are naturally occurring and present a diverse set of chemical and  
93 physical challenges to plants. These soils are widely distributed in western North America,

94 stretching from the Baja peninsula to Alaska, but typically occurring in relatively small and  
95 isolated patches (Alexander *et al.*, 2007; Kruckeberg, 1984). While most terrestrial soils are  
96 derived from crustal rocks, serpentine soils are formed by the weathering of ultramafic rocks  
97 that originate in earth's mantle (Alexander *et al.*, 2007). Because of this unique origin, serpentine  
98 soils are deficient in many essential plant nutrients [calcium (Ca), nitrogen (N), potassium (K),  
99 and phosphorus (P)] while also having elevated levels of magnesium (Mg) and heavy metals  
100 [nickel (Ni), cobalt (Co), chromium (Cr)]. In addition, these soils can be shallow and have lower  
101 water holding capacity than non-serpentine soils (Alexander *et al.*, 2007). This suite of factors  
102 makes serpentine soils inhospitable to many plant species resulting in sparse vegetative cover  
103 and habitats that are prone to erosion and elevated soil temperatures (Kruckeberg, 2002). The  
104 phrase "serpentine syndrome" was used by Jenny (1980) to emphasize the collective and often  
105 interacting effects of the chemical, physical, and biotic characteristics that make these soils such  
106 a difficult substrate for plant growth.

107         Despite this harsh and complex environment, serpentine habitats are home to unique  
108 plant communities with many endemic species. Serpentine endemism has long fascinated plant  
109 biologists; however, endemics may be reproductively isolated from their non-serpentine sister  
110 taxa, hindering genetic analysis of tolerance. Other species have populations that grow both on  
111 and off of serpentine soils and often show ecotypic differentiation (reviewed O'Dell &  
112 Rajakaruna, 2011). Field reciprocal transplant studies (Hufford *et al.*, 2008; Jurjavcic *et al.*, 2002;  
113 Kruckeberg, 1950, 1967; Sambatti & Rice, 2006; J. W. Wright *et al.*, 2006) and lab-based common  
114 garden experiments (Kay *et al.*, 2011; Kruckeberg, 1950; O'Dell & Claassen, 2008) typically

115 demonstrate strong selection in serpentine soils with non-serpentine populations having higher  
116 mortality or greatly reduced growth relative to serpentine populations. Many studies testing for  
117 intraspecific differences use hydroponic culture to test the effects of isolated soil chemical  
118 features on plant growth. These experiments show that serpentine populations are primarily  
119 adapted to low Ca and a low Ca:Mg ratio (Brady *et al.*, 2005; Palm & Van Volkenburgh, 2014),  
120 but that in some species serpentine adaptation involves tolerance to high Mg (Proctor, 1970) or  
121 Ni (Burrell *et al.*, 2012; Gabbrielli *et al.*, 1990). However, caution is needed in interpreting  
122 hydroponic studies because these experiments may fail to replicate the complex interactions  
123 between different ions in the soil environment. Mg, Ca and Ni are all +2 cations and studies  
124 have revealed that differing concentrations of each affect plant availability of the other ions  
125 (Brooks, 1987; Gabbrielli & Pandolfini, 1984).

126         Despite the significant amount of work on serpentine adaptation, relatively little is  
127 known about the genetic basis of serpentine tolerance. The complexity of serpentine habitats  
128 suggests that changes at many loci might be necessary to adapt to these soils. Indeed, genome  
129 scans comparing serpentine and non-serpentine populations of *Arabidopsis lyrata* find dozens of  
130 highly differentiated SNPs (Turner *et al.* 2008, Turner *et al.* 2010, Arnold *et al.* 2016). In contrast,  
131 QTL mapping studies find that major genes contribute to elevated Ni tolerance in serpentine  
132 populations of *Silene vulgaris* and the serpentine endemic *Caulanthus amplexicaulis* var. *barbarae*  
133 (Bratteler *et al.* 2006, Burrell *et al.* 2012). Few QTLs of major effect were also shown to control  
134 reproductive versus vegetative investment which is thought to enhance drought escape on fast-  
135 drying serpentine soils in *Microseris douglasii* (Gailing *et al.* 2004). These QTL studies focused on

136 very specific traits differentiating serpentine and non-serpentine plants which is useful for  
137 elucidating important selective agents in these habitats but presumably presents a narrow view  
138 of the genetic basis of serpentine adaptation. QTL mapping approaches, in general, are limited  
139 in the genetic variants that are interrogated and the power to detect loci of small effect coupled  
140 with the overestimation of effects for detected loci (Beavis, 1994; Rockman, 2012). On the other  
141 hand, while genome scans can provide a more unbiased view of the loci under selection because  
142 these variants are not linked to relevant traits it is not known which of the outlier genes are  
143 most critical for tolerance and which may be subtle modifiers. Most importantly perhaps, none  
144 of the variants involved in serpentine adaptation identified by either approach have been tested  
145 for their fitness effects in the field so their true adaptive value is unknown.

146         The work presented here characterizes the genetic basis of adaptation to serpentine soils  
147 in *Mimulus guttatus* (Phrymaceae). *M. guttatus* is an outcrossing annual that grows throughout  
148 much of Western North America in seasonally wet soils. Across this range, *M. guttatus* displays  
149 tremendous ecological diversity and has become a model system for ecological genetic studies  
150 because of its tractability for experimental manipulation and a wealth of genetic and genomic  
151 resources (Hellsten *et al.*, 2013; Wu *et al.*, 2007). Populations of *M. guttatus* can be found in close  
152 proximity on and off serpentine soils across much of its range. No obvious morphological  
153 features distinguish populations growing on the different soil habitats and previous work has  
154 provided mixed evidence for genetic differentiation in edaphic tolerance between serpentine  
155 and non-serpentine populations. Two hydroponic studies grew populations from each soil type  
156 in low Ca:Mg conditions and did not find differential tolerance between serpentine and non-

157 serpentine plants (Gardner & Macnair, 2000; Murren *et al.*, 2006). However, Palm *et al.* (2012)  
158 demonstrated that seedlings from a non-serpentine population do not survive past the juvenile  
159 stage when planted on native serpentine soil in the lab while a serpentine population has high  
160 survival.

161 Field-based reciprocal transplant studies are the best test for local adaptation. Here we  
162 present the results from three transplant studies carried out at different sites and in different  
163 years. Seedlings from multiple serpentine and non-serpentine populations as well as hybrid  
164 mapping populations (F2s or F3s) were planted at serpentine and non-serpentine field sites in  
165 California. Using multiple populations and conducting multiple experiments allows us to test  
166 for adaptation to the serpentine habitat, as opposed to highly local characteristics of a particular  
167 site or year. We use a bulk segregant approach to map a major QTL underlying survival  
168 differences at the serpentine field sites and show that this QTL has consistent effects across  
169 years and in two different populations. We follow-up this field work with a lab-based common-  
170 garden experiment in native serpentine soils to isolate the effects of selection due to soil  
171 variables and test how serpentine populations perform on foreign serpentine soils.

## 172 MATERIALS AND METHODS

### 173 *Reciprocal transplant experiments*

174 Seedlings from serpentine and non-serpentine *M. guttatus* populations were  
175 transplanted to serpentine and non-serpentine field sites to test for local adaptation. Three  
176 reciprocal transplant experiments were conducted: two at the Donald and Sylvia McLaughlin  
177 Natural Reserve (MCL) in 2010 and 2012 and a third at the Bureau of Land Management's Red



178 Hills Area (RH; Fig. 1) in 2010. Soil habitat of the seed collections used in these studies was  
179 established by a combination of field observations, USGS soil database designation for  
180 collection localities and, whenever possible, soil analysis (Fig. 1). Soil samples were taken by  
181 bulking soil from the top ~8-12cm (roughly the rhizosphere of *M. guttatus*) from multiple  
182 locations throughout the population. These samples were analyzed for mineral nutrient content  
183 (see supplement for analysis details) and all serpentine populations had soil Ca:Mg levels below  
184 0.35 while all non-serpentine populations were above 1 (sTable 1). Field seeds were planted in  
185 the greenhouse and crossed to derive full-sib families (1-2 families/population) for the 2010  
186 experiments. The 2012 experiment used pooled seed created by combining equal numbers of  
187 seeds from 20 field collected maternal families/population. The MCL F2 mapping population  
188 was generated by reciprocally crossing the REM (serpentine) and SOD (non-serpentine) inbred  
189 lines and selfing the resultant F1s. In 2012 F3s from the same parental lines were produced by  
190 crossing 120 pairs of F2s and pooling ~100 seeds from each cross. The RH mapping population  
191 consisted of outbred F2s generated by crossing two separate F1s that had unique inbred lines of  
192 the SLP (serpentine) and KFY (non-serpentine) populations as parents.

193         Three gardens were established for each experiment – 2 serpentine and 1 non-  
194 serpentine. However, dry conditions in 2012 resulted in heavy mortality at one of the serpentine  
195 sites prior to the first census; therefore, all details refer to the remaining two sites. Seeds were  
196 germinated on potting soil (Fafard 3B) outside at the McLaughlin Reserve in late January/early  
197 February and transplanted bare root to field plots 2 to 6 days after cotyledon emergence.  
198 Transplants were randomized to cleared plots within native *M. guttatus* populations and

199 marked with toothpicks. In 2010 small plots (4 x 3 seedlings, ~ 7.5cm x 5 cm) were grouped  
200 together into blocks (12 plots/block with 6-8 blocks/site) and fifteen to thirty-five seedlings per  
201 family (sTable 1) along with ~50 F1s and ~500 F2s were transplanted to each field site. In 2012,  
202 seedlings were transplanted to cleared plots of 8x10 seedlings (~35x45cm). Poor germination of  
203 some populations resulted in variable replication with 9-82 replicates/population/site (sTable 1).  
204 In addition, 800-1100 F3s were randomized within the 2012 plots. Planting date was recorded  
205 for all seedlings and survival time was calculated relative to planting date. In 2012, some late  
206 germinating individuals were transplanted to the field plots at the three-week census. The  
207 inclusion of these late transplants should not affect our survival analysis; if anything, they  
208 would make it more conservative.

209         Transplant survival as well as juvenile and adult size traits were recorded. Restrictions  
210 at both MCL and RH prohibited open pollination of the transplants so we were not able to  
211 collect more complete fitness data. In 2010 transplant survival was scored three weeks after  
212 planting and then weekly thereafter. In 2012 survival was scored at three and nine weeks after  
213 transplantation. Rosette diameter was measured 3, 4 and 5 weeks post-transplanting for the  
214 MCL2012, MCL2010 and RH2010 experiments respectively. In 2010, transplants were removed  
215 just prior to flowering, when the plants had buds with visible corolla tissue (for convenience we  
216 refer to this as “flowering date”). Height and length of the 1<sup>st</sup> true leaf were measured at  
217 flowering. The 2010 experiments were terminated in early June when most plants had flowered  
218 or died (>90% at all sites). As most of the mortality on serpentine soils in the 2010 experiments  
219 and the lab-based common garden (see below) occurred shortly after transplanting, we

220 concluded the 2012 experiment after 9 weeks in order to rescue a greater number of survivors  
221 for genotyping. None of the plants had flowered by this time so no measurements were taken.  
222 To collect tissue for genetic analyses, surviving F2/F3 individuals were shipped back to Duke,  
223 planted in potting soil and placed in the Duke greenhouses. Fresh bud tissue was collected from  
224 individual survivors as well as in bulk samples (taking one bud/F2) of serpentine and non-  
225 serpentine survivors for the MCL2010 experiment. We were not able to rescue all the F2s that  
226 survived to the end of the field experiments as some died after removal from the field plots but  
227 prior to tissue collection; however, the genotyped individuals appear to be representative of the  
228 overall group of survivors (see supplement).

229         Survival curves for serpentine, non-serpentine and hybrid plants in each planting  
230 habitat were constructed using Kaplan-Meier estimators calculated in with the package *survival*  
231 2.38 (Therneau, 2015) in R version 3.3.3 (R Core Team, 2017). Survival time was calculated as  
232 days from transplantation to death. Plants that flowered and were removed from plots were  
233 treated as censored data as were plants still alive at the end of the experiment. We used log-  
234 rank tests to analyze cumulative differences in the survival functions between all classes  
235 (serpentine, non-serpentine, F1 and F2/F3) in each habitat. Significant overall log-rank tests  
236 were followed by post-hoc pairwise comparisons to see which groups were significantly  
237 different. We also looked at survival differences by population as well as tested for cytoplasmic  
238 effects on survival in the F1s and F2s.

239         Differences in plant size and days to flowering between plants from serpentine and non-  
240 serpentine populations were analyzed using analysis of variance (ANOVA). We first checked

241 trait correlations and leaf length and height were highly correlated (MCL2010  $r = 0.81$ ; RH2010  $r$   
242  $= 0.75$ ) so we only include height in the subsequent analyses. While rosette diameter and height  
243 were also highly correlated (MCL2010  $r=0.50$ ; RH2010  $r = 0.60$ ) we analyze both traits separately  
244 as rosette diameter was measured early in the season and therefore scored on more plants than  
245 height. Both rosette diameter and height are negatively correlated with days to flower  
246 (MCL2010  $r = -0.35, -0.33$ ; RH2010  $r = -0.31, -0.11$  for rosette and height respectively). Boxplots of  
247 rosette diameter, height and days to flower for all plant classes in both habitats are provided in  
248 the supplement. However, high mortality at the serpentine sites resulted in unbalanced design  
249 so we restrict our formal analyses to the non-serpentine sites where we used two-way ANOVA  
250 to test for the main effect of habitat of origin while controlling for block effects. Tests were  
251 carried out in R using the `lmer()` function from the *lme4* package (Bates *et al.*, 2015) and block  
252 was treated as a random factor. Type II Wald F tests with Kenward-Roger degrees of freedom  
253 calculated with the `Anova()` function from the package *car* (Fox & Weisberg, 2011). Rosette  
254 diameter and height were log-transformed to satisfy residual normality assumptions.

### 255 *QTL mapping*

256 To rapidly map QTLs controlling survival differences on serpentine soil we performed a  
257 bulk segregant analysis (BSA; Michelmore *et al.*, 1991) with the F2 survivors from the MCL2010  
258 experiment. Bulk DNA samples collected from the serpentine and non-serpentine survivors  
259 were sequenced on the Illumina platform to generate allele counts at SNPs across the genome.  
260 DNA was extracted using a urea protocol modified from Shure *et al.* (1983), submitted to the  
261 Duke Genome Sequencing and Analysis Core Resource for library preparation, and sequenced

262 on the Illumina GAI for 75bp SE reads. To improve coverage in the serpentine survivor pool,  
263 the DNA was later re-submitted for library preparation and sequencing on the Illumina  
264 HiSeq2000 for 100bp SE reads. The inbred parental lines (REM and SOD) were sequenced for  
265 150PE reads on the HiSeq2000 following library preparation with the Nextera DNA Library  
266 Prep Kit (Illumina, San Diego, CA, USA) from DNA extracted with the GeneJET Genomic DNA  
267 Purification Kit (Thermo Fisher Scientific, Waltham, MA, USA).

268         Raw reads were checked for quality using FastQC (Andrews, 2010) and then trimmed  
269 for quality and adapter sequence with TrimGalore (version 0.4.0 with cutadapt version 1.8.3;  
270 Martin, 2011) on default settings except for stringency --5. The quality scores for the reads from  
271 the Illumina GAI platform were adjusted to Sanger encoding using seqtk (version 1.2; Li, 2012).  
272 Trimmed reads were then mapped to the *M. guttatus* reference genome v2.0 (Hellsten *et al.*,  
273 2013) using the BWA (version 7.15) mem algorithm with default settings (Li & Durbin, 2010).  
274 Bam file cleaning and duplicate marking was performed using PicardTools according to  
275 GATK's best practices (McKenna *et al.*, 2010; Van der Auwera *et al.*, 2002). Variants were called  
276 using GATK's HaplotypeCaller (version 3.4) followed by joint genotyping on all four samples –  
277 two F2 bulks and two parental samples – using GenotypeGVCFs. Indels and repetitive regions  
278 (identified using a bed file created from the hardmasked genome available on phytozome) were  
279 removed from the variant file using vcftools (version 0.1.14; Danecek *et al.*, 2011). Finally, SNPs  
280 were thinned in vcftools to remove variants that were within 100bp of each other.

281         Bulk segregant is based on the expectation that alleles frequencies in the two pools will  
282 be similar across the genome but diverge in regions that contain QTLs. However, comparing

283 allele frequencies does not account for the overall differences in depth of coverage between our  
284 two bulks nor the random variation in sequencing depth. Thus, we use the G-statistic based on  
285 allele counts in each pool to quantify the differentiation between our bulks as it accounts for the  
286 weight of evidence related to sample sequence depth (Magwene *et al.*, 2011). To generate a list  
287 of high-confidence SNP markers we filtered the raw variant calls for mapping quality  $\geq 30$  and  
288 depth  $\geq 3$  and  $\leq 95^{\text{th}}$  percentile (DP  $\leq 18$  non-serpentine pool; DP  $\leq 48$  serpentine pool). Both  
289 parental lines had raw coverage around 30x and were filtered to retain sites with  $12 \leq \text{DP} \leq 90$ .  
290 We restricted our analysis to sites where the F2 pools were segregating and the parental lines  
291 were fixed for alternate alleles. The allele calls in the parental samples were used to polarize  
292 SNP alleles in the F2 pools. Because of low coverage in the F2 pools (mean coverage post-  
293 filtering non-serpentine = 7.5x; serpentine pool = 18x), we summed counts of serpentine and  
294 non-serpentine alleles in each pool across windows of 25 SNPs. Windows larger than 1Mb were  
295 excluded and G was calculated from the windowed allele counts.

296 Putative QTLs identified via BSA were confirmed by genotyping individual F2s at PCR-  
297 based markers and comparing patterns of segregation distortion between the serpentine and  
298 non-serpentine survivors. DNA was extracted from the F2s and parents using a modified CTAB  
299 protocol (Kelly & Willis, 1998). The parents were screened for exon-primed intron-crossing  
300 markers derived from expressed sequence tags (Fishman *et al.*, 2008). Polymorphism was  
301 evaluated in terms of length variation of the PCR products, typically caused by indel variation  
302 in the introns. Amplified products were run on an ABI 3730xl DNA Analyzer (Applied  
303 Biosystems, Foster City, CA, USA) for fragment analysis and fragment size was scored using

304 Genemarker (SoftGenetics, State College, PA, USA). All F2 survivors from the MCL2010  
305 experiment were genotyped at several markers in putative QTL regions (Fig. 3B and sTable 4).  
306 Markers were tested for goodness of fit with Mendelian (1:2:1) expectations using chi-square  
307 tests. The F2/F3 survivors from the RH2010 and MCL2012 experiments were also genotyped at  
308 markers within QTL identified in the MCL2010 mapping population.

### 309 *Lab-based common garden experiment*

310 To test whether field survival differences were due to soil properties as opposed to other  
311 characteristics of the serpentine habitat (e.g. water availability, exposure, community  
312 composition) we conducted a common garden experiment growing serpentine and non-  
313 serpentine plants on serpentine soil in lab conditions. Inbred lines from two on/off pairs  
314 (REM/SOD and SLP/TUL; Fig. 1) as well as F1s and F2s for each pair (except for the SLPxTUL  
315 F1 which had limited seeds) were grown on serpentine soil collected from each of the  
316 serpentine localities. The RH soil consisted of combined samples collected from each of the plots  
317 in the field experiment above. The MCL soil was collected ~0.8km away from the home site of  
318 the serpentine parent. The same soil was used by Palm *et al.* (2012) and they show that it is not  
319 significantly different in chemical composition from the soil at the parental site. The soils were  
320 sifted through a 2mm mesh screen and sterilized (121°C, 15psi, 90min).

321 Seeds were planted on 60x15mm petri plates, covered with ultrapure water (Nanopure  
322 Diamond purified) and stratified in the dark at 4°C for 5 days. Plates were then moved to a  
323 growth chamber (12 hours light; day/night temperatures of 22°C/18°C) and after radicle  
324 emergence (~2days) transferred with a cut-tip pipette to petri plates filled with serpentine soil.

325 Twelve seeds were planted per plate with 2-8 replicate plates/soil type for the parental lines and  
326 F1s and 40 plates per soil type for each of the F2s (20 plates per direction of the cross). Seedlings  
327 were checked daily and watered with ultrapure H<sub>2</sub>O when the soil surface was dry. Survival  
328 was scored weekly for five weeks. Final survival differences between lines were tested with G-  
329 tests of independence on overall counts of “dead” versus “alive.”

## 330 RESULTS

### 331 *Survival differences at serpentine field sites*

332 There were significant differences in survival between serpentine and non-serpentine  
333 plants at the serpentine field sites in all three reciprocal transplant experiments (Fig. 2). Very  
334 few non-serpentine plants survived to flower at the serpentine sites - MCL2010 1/91; RH2010  
335 4/253; MCL2012 2/91 – while plants from serpentine populations enjoyed intermediate survival  
336 rates. The survival rate for the F1s in both 2010 experiments was not significantly different from  
337 that of the serpentine populations indicating that serpentine tolerance is dominant. The F2s/F3s  
338 had intermediate survival rates that were significantly different from both the serpentine and  
339 non-serpentine classes in 2010 but in 2012 pairwise log-rank tests show no overall difference  
340 between the F3s and the serpentine plants. There were no significant survival differences at the  
341 non-serpentine sites except for the MCL2012 experiment where the F3s had higher survival than  
342 both the serpentine and non-serpentine plants.

343 Principal component analysis of soil chemical variables for field sites and population  
344 home sites separates serpentine and non-serpentine localities along PC1 and regions  
345 (McLaughlin versus Red Hills) along PC2. PC1 explains 48% of the overall variation and all the



346 variables except for boron (B) have similar loadings (sTable 2) emphasizing the complex nature  
347 of the differences between these habitats. Not surprisingly the serpentine soils have higher  
348 levels of Mg and lower levels of nearly all other elements analyzed (Fig. 1). The regional  
349 differences along PC2 indicate that McLaughlin soils have higher levels of B, Ca, sodium (Na)  
350 and sulfur (S) while Red Hills soils have higher levels of zinc (Zn) and iron (Fe). However, there  
351 is a fair bit of variation within these regional habitat clusters and even among samples from the  
352 same sites (e.g. REM which is both a population and one of the MCL serpentine transplant  
353 sites). This soil variation between localities may explain some of the survival differences  
354 between serpentine populations at the serpentine field sites (Fig. S1). While all the serpentine  
355 populations enjoyed significantly higher survival than the non-serpentine populations, some  
356 serpentine populations had higher survivorship rates than others: for example, the home RH  
357 serpentine population (SLP) had the highest survival of the three serpentine populations  
358 included in the RH2010 experiment. These differences could be due to local variation in soil  
359 chemistry or to other factors, such as soil physical properties, water availability or exposure.

#### 360 *Size differences at non-serpentine sites*

361 While there were no survival differences at the non-serpentine sites there were  
362 differences in plant size, wherein plants from non-serpentine populations were larger than  
363 those from serpentine populations (Fig. S2) indicating a potential cost to tolerance. In 2010 there  
364 were significant differences in rosette diameter between serpentine and non-serpentine plants at  
365 the non-serpentine field sites (RH  $F_{1,178}=6.71$ ,  $p=0.01$ ; MCL  $F_{1,173} = 4.245$ ,  $p=0.041$ ). However, there  
366 we did not detect differences in rosette diameter in 2012 ( $F_{1,71}=0.621$ ,  $p = 0.433$ ) possibly due to  
367 the lower sample size and earlier measurement date. Height and flowering time were only

368 measured for the 2010 experiments. There were significant height differences between  
369 serpentine and non-serpentine plants in the RH experiment ( $F_{1,139}=4.73$ ,  $p=0.031$ ) but not at MCL  
370 ( $F_{1,99}=0.05$ ,  $p=0.824$ ) and there were no significant differences in flowering time in either  
371 experiment (MCL  $F_{1,103}=0.258$ ,  $p=0.612$ ; RH  $F_{1,141}=0.069$ ,  $p=0.793$ ). An overall effect of planting  
372 habitat is evident in Fig. S2 where plants at the serpentine sites are smaller and flower slightly  
373 earlier.

#### 374 *Major QTL contributes to serpentine survival*

375 Using a bulk segregant approach we identified a single region of the genome that  
376 contributes to survival on serpentine soils. Sequencing pools of the F2 survivors from the  
377 MCL2010 experiment identified a QTL on the end of chromosome 13 displaying an elevated G-  
378 statistic relative to the rest of the genome (Fig. 3A). In this region, the serpentine allele  
379 frequency in the serpentine survivor pool is ~70% (Fig. S3) which is consistent with serpentine  
380 tolerance being dominant to non-tolerance. Furthermore, the allele frequency in the non-  
381 serpentine survivor pool is ~50% in this region as expected given that there were no survival  
382 differences at the non-serpentine site. The G-statistic and allele frequency estimates are  
383 somewhat noisy, largely due to the small size of the serpentine survivor pool which leads to  
384 increased sampling noise; this limited our ability to detect small effect QTL.

385 Using PCR-based markers (see Fig. 3B for marker locations) we genotyped all the  
386 individual survivors from both the serpentine and non-serpentine field sites for the MCL2010  
387 experiment. The genotyping results confirm the putative QTL on chromosome 13 and show that  
388 it has a major effect on survival. As there were no significant differences in survival at the non-

389 serpentine site we expect Mendelian segregation (1:2:1) in the survivors; however, survivors  
390 from the serpentine site will show segregation distortion at QTL controlling survival. Indeed, at  
391 one marker (MgSTS419) within the chromosome 13 QTL peak the non-serpentine survivors do  
392 not deviate from the expected 1:2:1 while none of the survivors at the serpentine site are  
393 homozygous for the non-serpentine allele (Fig. 3C). Other markers screened within the QTL  
394 region show similar patterns (sTable 4). Furthermore, the overall frequency of the serpentine  
395 allele was 69.8% in the serpentine survivors and their genotypic ratio was not significantly  
396 different from 1:2 serpentine homozygotes to heterozygotes ( $\chi^2=0.74$ , 1d.f.,  $p=0.389$ ), consistent  
397 with the serpentine allele being dominant. F3 survivors from the MCL2012 experiment were  
398 genotyped at the same marker and the serpentine survivors show significant distortion (Fig. 3C)  
399 while the non-serpentine survivors do not. Finally, we also show that this locus contributes to  
400 survival differences in the RH population where only a single survivor from the serpentine field  
401 sites is homozygous for the non-serpentine allele (Fig. 3C).

402 *QTL does not contribute to size differences at non-serpentine sites*

403 The reciprocal transplant experiments found that non-serpentine plants were larger than  
404 serpentine plants in the non-serpentine field sites. To see whether the survival QTL on  
405 chromosome 13 contributes to these differences in plant size we conducted two-way ANOVAs  
406 in *lme4* for each of the three field experiments treating genotype as a fixed effect and block as a  
407 random effect. Only rosette diameter in the RH2010 experiment indicated a significant effect of  
408 genotype (sTable 5). A post-hoc Tukey test showed that the non-serpentine homozygotes were  
409 significantly smaller ( $0.76\text{cm} \pm 0.09$ ) than the heterozygotes ( $0.98\text{cm} \pm 0.05$ ) at  $p < 0.05$ . These size  
410 differences are in the opposite direction from what we observed in the field populations where

411 plants from non-serpentine populations were larger. We do not know whether these juvenile  
412 size differences have an effect on fitness so it is not clear whether these genotypic differences  
413 are adaptive or maladaptive at the non-serpentine sites.

414 *Serpentine soils impose very strong selection*

415 We calculated selection coefficients from the survivor genotype frequencies to  
416 understand how selection is acting on our QTL. Assuming initial genotype frequencies in the  
417 F2s/F3s were 1:2:1 at the time of transplanting, survival rates for each genotype were calculated  
418 by extrapolating the genotypic ratio from the survivors we were able to collect tissue from to  
419 the entire survivor pool. Using survival rate as our fitness measure, selection coefficients were  
420 calculated as  $1-w_{12}$  or  $w_{22}$  for the relative fitness of the heterozygote and the non-serpentine  
421 homozygote respectively. Selection against the non-serpentine homozygotes was extremely  
422 strong in all three field experiments (Table 1) though it was weaker in the MCL2012 experiment  
423 likely due to the fact that this experiment was terminated 5 weeks earlier than the 2010  
424 experiments. Serpentine tolerance is not completely dominant as the heterozygotes have a  
425 slightly lower survival rate compared to the serpentine homozygotes (Table 1) with dominance  
426 being less pronounced in the RH cross. These results demonstrate large and consistent effects of  
427 this QTL on serpentine survival across years and in different populations.

428 *Lab-based common garden replicates survival differences observed in field*

429 Similar to the results from the field studies, the non-serpentine lines did not survive on  
430 the serpentine soils in the common garden experiment (Fig. 4). These results indicate that  
431 properties of the soils, as opposed to other environmental variables that differed between the

432 field sites, are the primary selective agents contributing to the observed survival differences.  
433 Both serpentine lines had high survival on their home soils (Fig. 4). The MCL F1s and F2s had  
434 high survival on the MCL soil again indicating that tolerance is dominant in this cross.  
435 Furthermore, the MCL F2s 5 week survival rate was 83.6% consistent with the simple genetic  
436 basis of tolerance found by the field mapping study. The RH F2s had an intermediate survival  
437 rate on their home soil (40%). We genotyped these RH F2 survivors at a marker within our  
438 chromosome 13 QTL region and find that the genotype frequencies are significantly distorted  
439 relative to Mendelian expectations (Fig. 3C) and that the strength of selection is similar to that  
440 observed in the field (Table 1). Tolerance appears to be more partially dominant in the RH cross  
441 compared to MCL (Table 1) which may explain the overall lower survival rate of the RH F2s in  
442 the common garden set-up. Additionally, there may be other loci that contribute to survival on  
443 the RH soil.

#### 444 *Serpentine populations not equally tolerant of foreign serpentine soil*

445 Despite the fact that the two serpentine lines share the major survival QTL they are not  
446 equally tolerant of each other's soil. The RH serpentine line performs equally well on both soils  
447 ( $G=0.84$ ,  $p=0.36$ ) while the REM line has significantly lower survival on the RH soil than on its  
448 home soil ( $G=27.8$ ,  $p=1.37e-7$ ). Given that the seedlings were replicates of an inbred line this  
449 suggests that environmental variation contributes to survival. The differences between  
450 replicates could be due to variation in water availability both within and between plates, which  
451 would affect the rate at which plants are acquiring water and solutes from the soil matrix as  
452 well as heterogeneity in the soil itself. The non-serpentine lines had low survival on both soil  
453 types; however, the TUL line took longer to die on the MCL soil compared to the RH soil –

454 100% mortality by week 1 census on RH soil but only 100% mortality at week 4 on MCL soil.  
455 The RH F2s had very high survival (94.1%) on the MCL soil which is likely due to this soil being  
456 less stressful to the non-serpentine parent TUL. The MCL F2s on the other hand had very low  
457 survival on the RH soil (4.5%). The difference in overall survival between the REM parental line  
458 and the MCL F2s on the RH soil indicates that there are other loci which contribute to survival  
459 on the RH soil. In addition, the REM and SLP lines may have different serpentine alleles at the  
460 QTL with different functionalities.

461 Variation in the chemical composition of the MCL and RH soils may help to explain the  
462 patterns of survival observed in the common garden experiment. The soil from the RH field  
463 sites has lower mean absolute levels of both Ca ( $112.83 \pm 20.1$ ) and Mg ( $1125 \pm 34.5$ ) as well as an  
464 overall lower Ca:Mg (0.1) compared to the MCL soils (Ca  $515.17 \pm 119.0$ ; Mg  $2471.83 \pm 322.0$ ;  
465 Ca:Mg 0.21). The RH soils also have higher average Ni ppm ( $19.5 \pm 2.4$ ) than MCL ( $8.4 \pm 1.19$ )  
466 while the non-serpentine soils have low Ni levels (RH-off =  $1.27 \pm 0.12$ ; MCL-off  $0.4 \pm 0.08$ ).  
467 Taken together these results suggest that the RH serpentine soil presents an overall harsher  
468 environment than the MCL soil. Elucidating the mechanism whereby soil chemical differences  
469 actually influence serpentine tolerance requires more detailed experiments isolating individual  
470 variables. Furthermore, a full QTL mapping study of the RH population would help to confirm  
471 whether there are other loci contributing to serpentine tolerance in this population.

## 472 DISCUSSION

473 *Simple genetic basis of serpentine adaptation in M. guttatus*

474 Non-serpentine populations of *M. guttatus* are unable to survive when planted on  
475 serpentine soils in both the field and the lab while serpentine populations enjoy moderate to  
476 high survival rates. Reciprocal transplant studies between serpentine and non-serpentine  
477 populations in other species have also found survival differences at serpentine sites (e.g.  
478 *Collinsia sparsiflora* (J. W. Wright *et al.*, 2006), *Helianthus exilis* (Sambatti & Rice, 2006), *Leptosiphon*  
479 *parviflorus* (Dittmar, 2017) and even long-lived pines (J. W. Wright, 2007)). We also found  
480 strong selection against non-serpentine plants in the common-garden experiment indicating  
481 that soil variables mediate these survival differences. By planting mapping populations in the  
482 field we were able to directly map loci contributing to these viability differences. The bulk  
483 segregant analysis identified a region on the end of chromosome 13 showing a large enrichment  
484 of serpentine alleles in the survivors from serpentine sites relative to survivors at the non-  
485 serpentine sites. Genotyping the individual F2 survivors from each of the habitats confirmed  
486 this region as a major effect QTL that explains 71% (2012) and 84% (2010) of the survival  
487 differences between the parents at the McLaughlin field sites. In addition, the serpentine allele  
488 is largely dominant with heterozygotes having only slightly reduced survival rates relative to  
489 serpentine homozygotes.

490 The simple genetic basis of serpentine adaptation in *M. guttatus* supports other QTL  
491 studies showing major gene effects for serpentine tolerance (Bratteler *et al.*, 2006; Burrell *et al.*,  
492 2012). These QTL results contrast with findings from genome scans in *Arabidopsis* where many  
493 loci show elevated levels of differentiation between serpentine and non-serpentine populations  
494 (Arnold *et al.*, 2016; Turner *et al.*, 2010). However, it is necessary to connect variants to fitness

495 differences in the field in order to understand their true adaptive value and by directly mapping  
496 on field survival differences, this study demonstrates that a major locus underlies adaptation to  
497 complex serpentine habitats in *M. guttatus*. We do not presume that this study presents the full  
498 picture of the genetic basis of serpentine adaptation in *M. guttatus* as our BSA was  
499 underpowered to detect loci of smaller effect due to the limited size of the serpentine survivor  
500 pool (Magwene *et al.*, 2011). Future work combining both high-powered mapping studies as  
501 well as genomic scan approaches will provide a more complete picture of the genetic  
502 architecture of adaption to serpentine soils in *M. guttatus*.

503         The QTL is currently localized to a roughly 1.5Mb region on the end of chromosome 13  
504 which contains several hundred genes. This region contains a homolog of one of the putative  
505 serpentine adaptation genes in *A. lyrata* (Turner *et al.* 2010) that is in the RING/U-Box  
506 superfamily and is involved in zinc ion binding. A gene encoding a glutathione S-transferase  
507 (GST) protein which function in stress response and heavy metal tolerance is also found in this  
508 interval (reviewed Edwards *et al.*, 2000; Yadav, 2010). Additionally, a number of genes have  
509 annotations indicating transporter or metal binding activity. However, in order to prioritize  
510 candidate genes it will be necessary to identify the actual traits underlying the observed  
511 survival differences. Palm *et al.* (2012) grew the same REM and SOD lines as we used (these  
512 were the parents of the MCL mapping population) in hydroponic culture with altered Ca:Mg.  
513 They found that the serpentine line (REM) was more tolerant of the low Ca:Mg growth  
514 environment based on differences in biomass and photosynthetic rate. Adaptation to low  
515 Ca:Mg may be an important driver of adaptation to serpentine habitats in *M. guttatus*. However,



516 our QTL interval does not contain any calcium or magnesium specific transporters such as CAX  
517 genes which have been implicated in tolerance to low Ca:Mg (Bradshaw, 2005). Finemapping  
518 efforts are underway that will narrow the QTL region to identify the causal locus. Finemapping  
519 will also help to address whether this QTL is actually comprised of multiple linked loci as might  
520 be predicted if adaptation to serpentine soils occurred and is maintained in the face of gene flow  
521 (Yeaman & Otto, 2011; Yeaman & Whitlock, 2011).

#### 522 *Cost to tolerance*

523 Local adaptation is defined as a genotype by environment interaction where local  
524 genotypes have higher fitness than foreign ones. The survival differences at the serpentine sites  
525 indicate strong fitness reductions for non-serpentine plants in these habitats. While there were  
526 no survival differences between the ecotypes at the non-serpentine field sites, we did detect  
527 differences in plant size where non-serpentine plants were larger than serpentine plants. Palm  
528 et al (2012) found similar differences in biomass between the REM/SOD pair from the  
529 McLaughlin Reserve when grown in potting soil. Work in other species has also found that  
530 serpentine-tolerant plants do not grow as well as non-serpentine plants when grown together  
531 on non-serpentine soils (Jurjavcic *et al.*, 2002; Kruckeberg, 1954; Proctor & Woodell, 1975;  
532 Sambatti & Rice, 2006). It's thought that these growth rate differences may lead to a reduction in  
533 competitive ability of serpentine tolerant plants in non-serpentine sites which typically have  
534 higher vegetative cover. However, the connection between growth rate differences and fitness is  
535 not clear and we were limited in our ability to detect such a tradeoff as we were not allowed to  
536 let the transplants flower and set seed in the field.

537 *Same QTL contributes to serpentine adaptation in second population*

538           The reciprocal transplant experiments found differences in survival rates between  
539 serpentine populations collected from different localities. At both MCL and RH the home  
540 serpentine populations had the highest survival suggesting that not all serpentine *M. guttatus*  
541 populations are equally tolerant to all serpentine soils but rather that they may be locally  
542 adapted to the specific characteristics of their home patch. However, these survival differences  
543 in the field could have been due to other environmental variables that differed between  
544 localities. The lab-based common-garden experiments directly tested the role of soil variables on  
545 survival. While the RH serpentine population enjoyed high survival on both soils, the MCL  
546 population had significantly lower survival when planted on the RH soil compared to its home  
547 soil. Such findings are perhaps not surprising given the patchy distribution of serpentine soils  
548 and variation in chemical (Fig. 1) and physical properties arising from differences in the  
549 primary mineralogical composition of parent materials, degree and conditions of metamorphic  
550 alteration and degree of weathering (Alexander *et al.*, 2007; Kruckeberg, 1984; Proctor *et al.*,  
551 1975; Whittaker, 1954).

552           The tolerance differences between the RH and MCL populations are especially  
553 interesting because we found that they share the same major QTL. Genotyping the survivors  
554 from the RH serpentine field sites and soil plates showed that very few of the survivors were  
555 homozygous for the non-serpentine allele at the QTL ( $s=0.9$  in both experiments). We do not  
556 know whether the RH and MCL populations represent independent evolutions of serpentine  
557 tolerance. However, based on geography – these two populations are ~300km apart and

558 separated by the Central Valley in CA where there is no serpentine soil (Fig. 1) – this seems like  
559 a reasonable hypothesis. The differences in survival on the two soils between the populations  
560 suggests that either there are other loci required to grow on the RH soil which are not shared  
561 between the populations or that the populations have different alleles, or even different loci  
562 underlying this shared QTL. Serpentine and non-serpentine populations of *M. guttatus* grow  
563 throughout Western North America, often in close proximity, providing an ideal system for  
564 investigating the distribution of this major serpentine tolerance QTL and to address questions of  
565 parallel adaptation. Future work aims to determine whether the shared genetic basis of  
566 tolerance is due to a single mutational origin followed by migration or if there has been  
567 repeated selection from standing variation or independent mutations at the same locus.

## 568 *Conclusion*

569 Many classic examples of adaptive differentiation between populations or closely  
570 related species involve changes at one or a few loci: cryptic coloration (Hoekstra *et al.*, 2006;  
571 van't Hof *et al.*, 2011), mimicry (Baxter *et al.*, 2010), shifts from marine to freshwater (Colosimo *et*  
572 *al.*, 2005) and pollinator shifts (Bradshaw Jr & Schemske, 2003). These cases are similar to the  
573 colonization of serpentine soils where populations may initially be far from a new fitness  
574 optima with limited intermediate habitat and/or where intermediate phenotypes have low  
575 fitness. Such situations likely favor the fixation of large effect loci (Dittmar *et al.*, 2016). *M.*  
576 *guttatus* has colonized other harsh habitats such as copper mine tailings, hot springs and coastal  
577 cliffs (Selby *et al.*, 2014) and large effect QTLs have been found for traits contributing to  
578 adaptation to these habitats (Hendrick *et al.*, 2016; Lowry *et al.*, 2009; K. M. Wright *et al.*, 2015).

579 Interestingly, none of these major QTL involved in adaptation to stressful abiotic habitats in *M.*  
580 *guttatus* are shared. For example, the major copper tolerance locus is on chromosome 9, yet, the  
581 focal copper tolerant populations occur only 20km from the RH serpentine site. While we have  
582 not investigated whether there may be some degree of cross tolerance between serpentine and  
583 copper adapted populations, they appear to have largely colonized these harsh habitats via  
584 independent, large effect loci. How *M. guttatus* consistently has the necessary genetic variation  
585 to produce these large phenotypic shifts to colonize numerous harsh habitats while many other  
586 species occurring in close proximity fail to adapt is unknown.

587

588

589

590

591

592

593

594

595

596

597 **Data Accessibility:**

598 All data will be made publicly available on Dryad upon the acceptance of this manuscript.

599 **Author Contributions:**

600 JPS and JHW designed the experiments and wrote the paper. JPS performed all experiments  
601 and analyses.

602 **Acknowledgements:**

603 Thank you to members of the Willis lab past and present and Graham Coop for comments on  
604 the ideas presented within and drafts of this manuscript. In particular, thank you to Kathy Toll  
605 for field assistance in 2012. We are also extremely grateful to Cathy Koehler and Paul Aigner at  
606 the McLaughlin Reserve for their help facilitating the field experiments and providing housing.  
607 We would also like to thank Sonya Jooma who assisted with plant care, field work and  
608 genotyping and Lex Flagel and Chenling Xu for help with the initial analysis of the bulk  
609 segregant data. This work was supported by grant number NSF IOS-1354688 to JHW.

610

611

612

613

614

615

616 **References:**

- 617 Alexander, E. B., Coleman, R. G., Keeler-Wolf, T., & Harrison, S. P. (2007). *Serpentine Geoecology of*  
618 *Western North America: Geology, Soils, and Vegetation*. New York, NY: Oxford University Press,  
619 Inc.
- 620 Andrews, S. (2010). FastQC: A quality control tool for high throughput sequence data. Retrieved from  
621 <https://www.bioinformatics.babraham.ac.uk/projects/fastqc/>
- 622 Antonovics, J., & Bradshaw, A. D. (1970). Evolution in closely adjacent plant populations VIII. Clinal  
623 patterns at a mine boundary. *Heredity*, 25(3), 349-362.
- 624 Arnold, B. J., Lahner, B., DaCosta, J. M., Weisman, C. M., Hollister, J. D., Salt, D. E., . . . Yant, L. (2016).  
625 Borrowed alleles and convergence in serpentine adaptation. *Proceedings of the National*  
626 *Academy of Sciences*, 113(29), 8320-8325.
- 627 Bates, D., Mächler, M., Bolker, B., & Walker, S. (2015). Fitting Linear Mixed-Effects Models Using lme4.  
628 2015, 67(1), 48.
- 629 Baxter, S. W., Nadeau, N. J., Maroja, L. S., Wilkinson, P., Counterman, B. A., Dawson, A., . . . Jiggins, C. D.  
630 (2010). Genomic Hotspots for Adaptation: The Population Genetics of Müllerian Mimicry in the  
631 *Heliconius melpomene* Clade. *PLOS Genetics*, 6(2), e1000794.
- 632 Beavis, W. D. (1994). *The power and deceit of QTL experiments: lessons from comparative QTL studies*.  
633 Paper presented at the Proceedings of the Forty-Ninth Annual Corn and Sorghum Industry  
634 Research Conference.
- 635 Bradshaw, H. D. (2005). Mutations in CAX1 produce phenotypes characteristic of plants tolerant to  
636 serpentine soils. *New Phytologist*, 167(1), 81-88.
- 637 Bradshaw Jr, H. D., & Schemske, D. W. (2003). Allele substitution at a flower colour locus produces a  
638 pollinator shift in monkeyflowers. *Nature*, 426, 176.
- 639 Brady, K. U., Kruckeberg, A. R., & Bradshaw Jr, H. D. (2005). Evolutionary ecology of plant adaptation to  
640 serpentine soils. *Annual Review of Ecology, Evolution, and Systematics*, 36(1), 243-266.
- 641 Bratteler, M., Lexer, C., & Widmer, A. (2006). Genetic architecture of traits associated with serpentine  
642 adaptation of *Silene vulgaris*. *Journal of Evolutionary Biology*, 19, 1149-1156.
- 643 Brooks, R. R. (1987). *Serpentine and its vegetation: a multidisciplinary approach* (Vol. 1): Dioscorides  
644 Press.
- 645 Burrell, A. M., Hawkins, A. K., & Pepper, A. E. (2012). Genetic analyses of nickel tolerance in a North  
646 American serpentine endemic plant, *Caulanthus amplexicaulis* var. *barbarae* (Brassicaceae).  
647 *American Journal of Botany*, 99(11), 1875-1883.
- 648 Colosimo, P. F., Hosemann, K. E., Balabhadra, S., Villarreal, G., Dickson, M., Grimwood, J., . . . Kingsley, D.  
649 M. (2005). Widespread Parallel Evolution in Sticklebacks by Repeated Fixation of Ectodysplasin  
650 Alleles. *Science*, 307(5717), 1928-1933.
- 651 Courbot, M., Willems, G., Motte, P., Arvidsson, S., Roosens, N., Saumitou-Laprade, P., & Verbruggen, N.  
652 (2007). A Major Quantitative Trait Locus for Cadmium Tolerance in *Arabidopsis halleri*  
653 Colocalizes with HMA4, a Gene Encoding a Heavy Metal ATPase. *Plant Physiology*, 144(2), 1052-  
654 1065.
- 655 Danecek, P., Auton, A., Abecasis, G., Albers, C. A., Banks, E., DePristo, M. A., . . . Genomes Project  
656 Analysis, G. (2011). The variant call format and VCFtools. *Bioinformatics*, 27(15), 2156-2158.
- 657 Deniau, A. X., Pieper, B., Ten Bookum, W. M., Lindhout, P., Aarts, M. G. M., & Schat, H. (2006). QTL  
658 analysis of cadmium and zinc accumulation in the heavy metal hyperaccumulator *Thlaspi*  
659 *caerulescens*. *Theoretical and Applied Genetics*, 113(5), 907-920.
- 660 Dittmar, E. L. (2017). *Local adaptation and fitness trade-offs*. Michigan State University. ProQuest  
661 Dissertations & Theses Global database.

- 662 Dittmar, E. L., Oakley, C. G., Conner, J. K., Gould, B. A., & Schemske, D. W. (2016). Factors influencing the  
663 effect size distribution of adaptive substitutions. *Proceedings of the Royal Society B: Biological*  
664 *Sciences*, 283(1828).
- 665 Edwards, R., Dixon, D. P., & Walbot, V. (2000). Plant glutathione S-transferases: enzymes with multiple  
666 functions in sickness and in health. *Trends in Plant Science*, 5(5), 193-198.
- 667 Felsenstein, J. (1976). The Theoretical Population Genetics of Variable Selection and Migration. *Annual*  
668 *Review of Genetics*, 10(1), 253-280.
- 669 Fishman, L., Aagaard, J., & Tuthill, J. C. (2008). Toward the evolutionary genomics of gametophytic  
670 divergence: Patterns of transmission ratio distortion in monkeyflower (*Mimulus*) hybrids reveal  
671 a complex genetic basis for conspecific pollen precedence. *Evolution*, 62(12), 2958-2970.
- 672 Fox, J., & Weisberg, S. (2011). *An R Companion to Applied Regression* (Second ed.). Thousand Oaks, CA:  
673 Sage.
- 674 Gabbrielli, R., & Pandolfini, T. (1984). Effect of Mg<sup>2+</sup> and Ca<sup>2+</sup> on the response to nickel toxicity in a  
675 serpentine endemic and nickel-accumulating species. *Physiologia Plantarum*, 62(4), 540-544.
- 676 Gabbrielli, R., Pandolfini, T., Vergnano, O., & Palandri, M. R. (1990). Comparison of two serpentine  
677 species with different nickel tolerance strategies. *Plant and Soil*, 122(2), 271-277.
- 678 Gardner, M., & Macnair, M. R. (2000). Factors affecting the co-existence of the serpentine endemic  
679 *Mimulus nudatus* Curran and its presumed progenitor, *Mimulus guttatus* Fischer ex DC.  
680 *Biological Journal of the Linnean Society*, 69, 443-459.
- 681 Gilbert, K. J., & Whitlock, M. C. (2017). The genetics of adaptation to discrete heterogeneous  
682 environments: frequent mutation or large-effect alleles can allow range expansion. *Journal of*  
683 *Evolutionary Biology*, 30(3), 591-602.
- 684 Gillespie, J. H., & Turelli, M. (1989). Genotype-environment interactions and the maintenance of  
685 polygenic variation. *Genetics*, 121(1), 129-138.
- 686 Hedrick, P. W. (1986). Genetic Polymorphism in Heterogeneous Environments: A Decade Later. *Annual*  
687 *Review of Ecology and Systematics*, 17, 535-566.
- 688 Hedrick, P. W., Ginevan, M. E., & Ewing, E. P. (1976). Genetic Polymorphism in Heterogeneous  
689 Environments. *Annual Review of Ecology and Systematics*, 7, 1-32.
- 690 Hellsten, U., Wright, K. M., Jenkins, J., Shu, S., Yuan, Y., Wessler, S. R., . . . Rokhsar, D. S. (2013). Fine-  
691 scale variation in meiotic recombination in *Mimulus* inferred from population shotgun  
692 sequencing. *Proceedings of the National Academy of Sciences*, 110(48), 19478.
- 693 Hendrick, M. F., Finseth, F. R., Mathiasson, M. E., Palmer, K. A., Broder, E. M., Breigenzer, P., & Fishman,  
694 L. (2016). The genetics of extreme microgeographic adaptation: an integrated approach  
695 identifies a major gene underlying leaf trichome divergence in Yellowstone *Mimulus guttatus*.  
696 *Molecular Ecology*, 25(22), 5647-5662.
- 697 Hoekstra, H. E., Hirschmann, R. J., Bunday, R. A., Insel, P. A., & Crossland, J. P. (2006). A Single Amino  
698 Acid Mutation Contributes to Adaptive Beach Mouse Color Pattern. *Science*, 313(5783), 101-104.
- 699 Hufford, K. M., Mazer, S. J., & Camara, M. D. (2008). Local adaptation and effects of grazing among  
700 seedlings of two native California bunchgrass species: Implications for restoration. *Restoration*  
701 *Ecology*, 16(1), 59-69.
- 702 Jain, S. K., & Bradshaw, A. D. (1966). Evolutionary divergence among adjacent plant populations I. The  
703 evidence and its theoretical analysis. *Heredity*, 21(3), 407-441.
- 704 Jenny, H. (1980). *The Soil Resource: Origin and Behavior* (Vol. 37). New York: Springer-Verlag.
- 705 Jurjavcic, N., Harrison, S., & Wolf, A. (2002). Abiotic stress, competition, and the distribution of the  
706 native annual grass *Vulpia microstachys* in a mosaic environment. *Oecologia*, 130(4), 555-562.
- 707 Kay, K. M., Ward, K. L., Watt, L. R., & Schemske, D. W. (2011). Plant speciation. *Serpentine: the evolution*  
708 *and ecology of a model system*. University of California Press, Berkeley, 71-96.



- 709 Kelly, A. J., & Willis, J. H. (1998). Polymorphic microsatellite loci in *Mimulus guttatus* and related species.  
710 *Molecular Ecology*, 7(6), 769-774.
- 711 Kruckeberg, A. R. (1950). *An Experimental Inquiry into the Nature of Endemism on Serpentine Soils*.  
712 (Ph.D.), University of California, Berkeley.
- 713 Kruckeberg, A. R. (1954). The ecology of serpentine soils: A symposium. III. Plant species in relation to  
714 serpentine soils. *Ecology*, 35, 267-274.
- 715 Kruckeberg, A. R. (1967). Ecotypic Response to Ultramafic Soils by Some Plant Species of Northwestern  
716 United States. *Brittonia*, 19(2), 133-151.
- 717 Kruckeberg, A. R. (1984). *California serpentes: flora, vegetation, geology, soils and management*  
718 *problems* (Vol. 78). Berkeley, CA: University of California Press.
- 719 Kruckeberg, A. R. (2002). *Geology and Plant Life*. Seattle, WA: University of Washington Press.
- 720 Levene, H. (1953). Genetic Equilibrium When More Than One Ecological Niche is Available. *The American*  
721 *Naturalist*, 87(836), 331-333.
- 722 Lexer, C., Welch, M. E., Durphy, J. L., & Rieseberg, L. H. (2003). Natural selection for salt tolerance  
723 quantitative trait loci (QTLs) in wild sunflower hybrids: Implications for the origin of *Helianthus*  
724 *paradoxus*, a diploid hybrid species. *Molecular Ecology*, 12(5), 1225-1235.
- 725 Li, H. (2012). seqtk Toolkit for processing sequences in FASTA/Q formats. Available from:  
726 <https://github.com/lh3/seqtk>.
- 727 Li, H., & Durbin, R. (2010). Fast and accurate long-read alignment with Burrows–Wheeler transform.  
728 *Bioinformatics*, 26(5), 589-595.
- 729 Linhart, Y. B., & Grant, M. C. (1996). Evolutionary Significance of Local Genetic Differentiation in Plants.  
730 *Annual Review of Ecology and Systematics*, 27, 237-277.
- 731 Lowry, D. B., Hall, M. C., Salt, D. E., & Willis, J. H. (2009). Genetic and physiological basis of adaptive salt  
732 tolerance divergence between coastal and inland *Mimulus guttatus*. *New Phytologist*, 183(3),  
733 776-788.
- 734 Macnair, M. R. (1991). Why the evolution of resistance to anthropogenic toxins normally involves major  
735 gene changes: the limits to natural selection. *Genetica*, 84(3), 213-219.
- 736 Macnair, M. R. (1993). Tansley Review No. 49. The Genetics of Metal Tolerance in Vascular Plants. *New*  
737 *Phytologist*, 124(4), 541-559.
- 738 Macnair, M. R., & Christie, P. (1983). Reproductive isolation as a pleiotropic effect of copper tolerance in  
739 *Mimulus guttatus*? *Heredity*, 50, 295.
- 740 Magwene, P. M., Willis, J. H., & Kelly, J. K. (2011). The Statistics of Bulk Segregant Analysis Using Next  
741 Generation Sequencing. *PLoS Comput Biol*, 7(11), e1002255.
- 742 Martin, M. (2011). Cutadapt removes adapter sequences from high-throughput sequencing reads.  
743 *EMBnet.journal*, 17(1), 10.
- 744 McKenna, A., Hanna, M., Banks, E., Sivachenko, A., Cibulskis, K., Kernytsky, A., . . . DePristo, M. A. (2010).  
745 The Genome Analysis Toolkit: A MapReduce framework for analyzing next-generation DNA  
746 sequencing data. *Genome Research*, 20(9), 1297-1303.
- 747 McNeilly, T. (1968). Evolution in closely adjacent plant populations III. *Agrostis tenuis* on a small copper  
748 mine. *Heredity*, 23(1), 99-108.
- 749 McNeilly, T., & Antonovics, J. (1968). Evolution in closely adjacent plant populations IV. Barriers to gene  
750 flow. *Heredity*, 23, 205.
- 751 Michelmore, R. W., Paran, I., & Kesseli, R. V. (1991). Identification of markers linked to disease-  
752 resistance genes by bulked segregant analysis: a rapid method to detect markers in specific  
753 genomic regions by using segregating populations. *Proceedings of the National Academy of*  
754 *Sciences*, 88(21), 9828-9832.
- 755 Murren, C. J., Douglass, L., Gibson, A., & Dudash, M. R. (2006). Individual and combined effects of Ca/Mg  
756 ratio and water on trait expression in *Mimulus Guttatus*. *Ecology*, 87(10), 2591-2602.



- 757 O'Dell, R. E., & Claassen, V. P. (2008). *Parallel evolution and convergent physiological tolerance*  
758 *mechanisms of serpentine-tolerant Achillea millefolium (Asteraceae) edaphic ecotypes*. Paper  
759 presented at the Sixth International Conference on Serpentine Ecology, Bar Harbor, ME.
- 760 O'Dell, R. E., & Rajakaruna, N. (2011). Intraspecific variation, adaptation, and evolution. In S. Harrison &  
761 N. Rajakaruna (Eds.), *Serpentine: The evolution and ecology of a model system* (pp. 97-137).  
762 Berkeley, CA: University of California Press.
- 763 Orr, H. A. (1998). The population genetics of adaptation: the distribution of factors fixed during adaptive  
764 evolution. *Evolution*, 52(4), 935-949.
- 765 Palm, E., Brady, K., & Van Volkenburgh, E. (2012). Serpentine tolerance in *Mimulus guttatus* does not  
766 rely on exclusion of magnesium. *Functional Plant Biology*, 39(8), 679-688.
- 767 Palm, E., & Van Volkenburgh, E. (2014). Physiological adaptations of plants to serpentine soil. In N.  
768 Rajakaruna, R. S. Boyd, & T. B. Harris (Eds.), *Plant ecology and evolution in harsh environments*  
769 (pp. 129–148). Hauppauge, New York: Nova Science Publishers.
- 770 Proctor, J. (1970). Magnesium as a toxic element. *Nature* 227, 227, 742-743.
- 771 Proctor, J., & Woodell, S. R. J. (1975). The Ecology of Serpentine Soils. *Advances in Ecological Research*,  
772 9, 255-366.
- 773 Proctor, J., Woodell, S. R. J., & MacFadyen, A. (1975). The Ecology of Serpentine Soils *Advances in*  
774 *Ecological Research* (Vol. Volume 9, pp. 255-366): Academic Press.
- 775 R Core Team. (2017). R: A language and environment for statistical computing. Vienna, Austria: R  
776 Foundation for Statistical Computing. Retrieved from <https://www.R-project.org/>
- 777 Rajakaruna, N. (2018). Lessons on Evolution from the Study of Edaphic Specialization. *The Botanical*  
778 *Review*, 84(1), 39-78.
- 779 Rockman, M. V. (2012). The QTN program and the alleles that matter for evolution: all that's gold does  
780 not glitter. *Evolution*, 66(1), 1-17.
- 781 Sambatti, J. B. M., & Rice, K. J. (2006). Local adaptation, patterns of selection, and gene flow in the  
782 Californian serpentine sunflower (*Helianthus exilis*). *Evolution*, 60(4), 696-710.
- 783 Schluter, D., & Conte, G. L. (2009). Genetics and ecological speciation. *Proceedings of the National*  
784 *Academy of Sciences*, 106(Supplement 1), 9955-9962.
- 785 Selby, J. P., Jeong, A. L., Toll, K., Wright, K. M., & Lowry, D. B. (2014). Methods and discoveries in the  
786 pursuit of understanding the genetic basis of adaptation to harsh environments in *Mimulus*. In  
787 N. Rajakaruna, R. S. Boyd, & T. B. Harris (Eds.), *Plant Ecology and Evolution in Harsh*  
788 *Environments*. NY: Nova Science Publishers, Inc.
- 789 Shure, M., Wessler, S., & Fedoroff, N. (1983). Molecular identification and isolation of the Waxy locus in  
790 maize. *Cell*, 35(1), 225-233.
- 791 Therneau, T. M. (2015). A Package for Survival Analysis in S (Version 2.38). Retrieved from  
792 <https://CRAN.R-project.org/package=survival>
- 793 Turner, T. L., Bourne, E. C., Von Wettberg, E. J., Hu, T. T., & Nuzhdin, S. V. (2010). Population  
794 resequencing reveals local adaptation of *Arabidopsis lyrata* to serpentine soils. *Nature Genetics*,  
795 42(2), 260-264.
- 796 Van der Auwera, G. A., Carneiro, M. O., Hartl, C., Poplin, R., del Angel, G., Levy-Moonshine, A., . . .  
797 DePristo, M. A. (2012). From FastQ Data to High-Confidence Variant Calls: The Genome Analysis  
798 Toolkit Best Practices Pipeline *Current Protocols in Bioinformatics*: John Wiley & Sons, Inc.
- 799 van't Hof, A. E., Edmonds, N., Dalíková, M., Marec, F., & Saccheri, I. J. (2011). Industrial Melanism in  
800 British Peppered Moths Has a Singular and Recent Mutational Origin. *Science*, 332(6032), 958-  
801 960.
- 802 Whittaker, R. H. (1954). The Ecology of Serpentine Soils. *Ecology*, 35(2), 258-288.

- 803 Willems, G., Drager, D. B., Courbot, M., Gode, C., Verbruggen, N., & Saumitou-Laprade, P. (2007). The  
804 Genetic Basis of Zinc Tolerance in the Metallophyte *Arabidopsis halleri* ssp. *halleri*  
805 (Brassicaceae): An Analysis of Quantitative Trait Loci. *Genetics*, *176*(1), 659-674.
- 806 Wright, J. W. (2007). Local adaptation to serpentine soils in *Pinus ponderosa*. *Plant and Soil*, *293*(1), 209-  
807 217.
- 808 Wright, J. W., Stanton, M. L., & Scherson, R. (2006). Local adaptation to serpentine and non-serpentine  
809 soils in *Collinsia sparsiflora*. *Evolutionary Ecology Research*, *8*(1), 1-21.
- 810 Wright, K. M., Hellsten, U., Xu, C., Jeong, A. L., Sreedasyam, A., Chapman, J. A., . . . Willis, J. H. (2015).  
811 Adaptation to heavy-metal contaminated environments proceeds via selection on pre-existing  
812 genetic variation. *bioRxiv*.
- 813 Wright, K. M., Lloyd, D., Lowry, D. B., Macnair, M. R., & Willis, J. H. (2013). Indirect Evolution of Hybrid  
814 Lethality Due to Linkage with Selected Locus in *Mimulus guttatus*. *PLoS Biol*,  
815 *11*(2), e1001497.
- 816 Wu, C. A., Lowry, D. B., Cooley, A. M., Wright, K. M., Lee, Y. W., & Willis, J. H. (2007). *Mimulus* is an  
817 emerging model system for the integration of ecological and genomic studies. *Heredity*, *100*(2),  
818 220-230.
- 819 Yadav, S. K. (2010). Heavy metals toxicity in plants: An overview on the role of glutathione and  
820 phytochelatin in heavy metal stress tolerance of plants. *South African Journal of Botany*, *76*(2),  
821 167-179.
- 822 Yeaman, S., & Otto, S. P. (2011). Establishment and maintenance of adaptive genetic divergence under  
823 migration, selection, and drift. *Evolution*, *65*(7), 2123-2129.
- 824 Yeaman, S., & Whitlock, M. C. (2011). The genetic architecture of adaptation under migration–selection  
825 balance. *Evolution*, *65*(7), 1897-1911.

826

827

828

829

830

831

832

833

834

835

836

837 **Figure captions:**

838 **Figure 1: A)** Locations of populations and field sites for reciprocal transplant studies. Serpentine  
839 localities are green while non-serpentine are pink. Red Hills localities are the darker shades.  
840 Transplant sites are marked with asterisks. Two serpentine transplant sites were used in each  
841 region but they are represented by a single point as, in both cases, sites are within 1km of each  
842 other. The REM and SLP populations are the home populations of one the serpentine transplant  
843 sites in McLaughlin and Red Hills respectively. Soil data obtained from  
844 <http://mrddata.usgs.gov/geology/state/state.php?state=CA> and serpentine soil distribution determined  
845 by extracting units with the rocktypes “peridotite” and “serpentinite” in R using packages  
846 rgdal, raster, rgeos and maps for shapefile manipulation and plotting. **B)** PCA biplot of soil  
847 variables for populations and field sites.

848 **Figure 2:** Kaplan-meier survival curves for serpentine, non-serpentine, F1 and F2/F3 plants in  
849 serpentine (top row) and non-serpentine (bottom row) field sites. P-values given for log-rank  
850 tests of all groups. For experiments with significant overall survival differences pairwise post-  
851 hoc log-rank tests were conducted and groups connected by the same letter are not significantly  
852 different. MCL2010 nonserpentine none of the pairwise posthoc tests were significant after  
853 Bonferroni correction.

854

855 **Figure 3: A)** G-statistic calculated from summed allele counts in 25-SNP windows for the  
856 MCL2010 serpentine and non-serpentine survivor pools. Points indicate mean window position.  
857 **B)** G-statistic for chromosome 13 containing the highest peak. PCR-based markers used to

858 genotype individual survivors for QTL confirmation shown on the X-axis. Markers from left to  
859 right are 778, 117, 310, 68, 419, 601 and 557 (MgSTS marker #'s  
860 <http://www.mimulusevolution.org/>). C) Genotype frequencies of survivors from field and  
861 common garden experiments shown for non-serpentine and serpentine sites. Survivors on  
862 serpentine soil deviate significantly from Mendelian expectations (1:2:1) in all experiments  
863 (MCL2010 (44):  $\chi^2=16.18$ ,  $p=0.00031$ ; MCL2012(116):  $\chi^2=16.19$ ,  $p=0.00031$ ; RH2010 (22):  $\chi^2=6.12$ ,  
864  $p=0.047$ ; RHPlates (119):  $\chi^2=34.72$ ,  $p=2.879e-08$ ). The survivors at the non-serpentine field sites  
865 do not differ from expected (MCL2010 (215):  $\chi^2=4.8$ ,  $p=0.091$ ; MCL2012(236):  $\chi^2=2.13$ ,  $p=0.35$ ;  
866 RH2010 (85):  $\chi^2=1.635$ ,  $p=0.442$ ). Degrees of freedom=2 for all tests. Number of individual  
867 genotyped given in parentheses above. The marker ID used for each experiment provided in  
868 legend.

869  
870 **Figure 4:** Survival in common garden experiment by genotype averaged across plates with  
871 standard errors. Serpentine populations shown in green and non-serpentine in pink. The  
872 number of plates planted per genotype on each soil type (MCL/RH soil) is given; 12 germinants  
873 planted/plate. The plot titles refer to the home region of the lines planted.

874

875

876

877

878

879

880 **Tables:**

881

882 *Table 1 Relative fitness and selection coefficients for each genotype at QTL on chromosome 13 on serpentine soil in four different*  
 883 *experiments.*

| <b>Experiment</b>     | <b>Genotype</b> | <b>Survival rate</b> | <b>Relative Fitness</b> | <b>Selection coefficient (s)</b> |
|-----------------------|-----------------|----------------------|-------------------------|----------------------------------|
| <b>McL Field 2010</b> | SS              | 25.1%                | 1                       | 0                                |
|                       | SN              | 18.1%                | 0.72                    | 0.28                             |
|                       | NN              | 0                    | 0                       | 1                                |
| <b>McL Field 2012</b> | SS              | 42.0%                | 1                       | 0                                |
|                       | SN              | 34.1%                | 0.81                    | 0.19                             |
|                       | NN              | 11.5%                | 0.28                    | 0.73                             |
| <b>RH Field 2010</b>  | SS              | 22.3%                | 1                       | 0                                |
|                       | SN              | 14.9%                | 0.67                    | 0.33                             |
|                       | NN              | 2.5%                 | 0.11                    | 0.89                             |
| <b>RH Plates Lab</b>  | SS              | 66.7%                | 1                       | 0                                |
|                       | SN              | 42.7%                | 0.64                    | 0.36                             |
|                       | NN              | 6.7%                 | 0.1                     | 0.9                              |

884

885

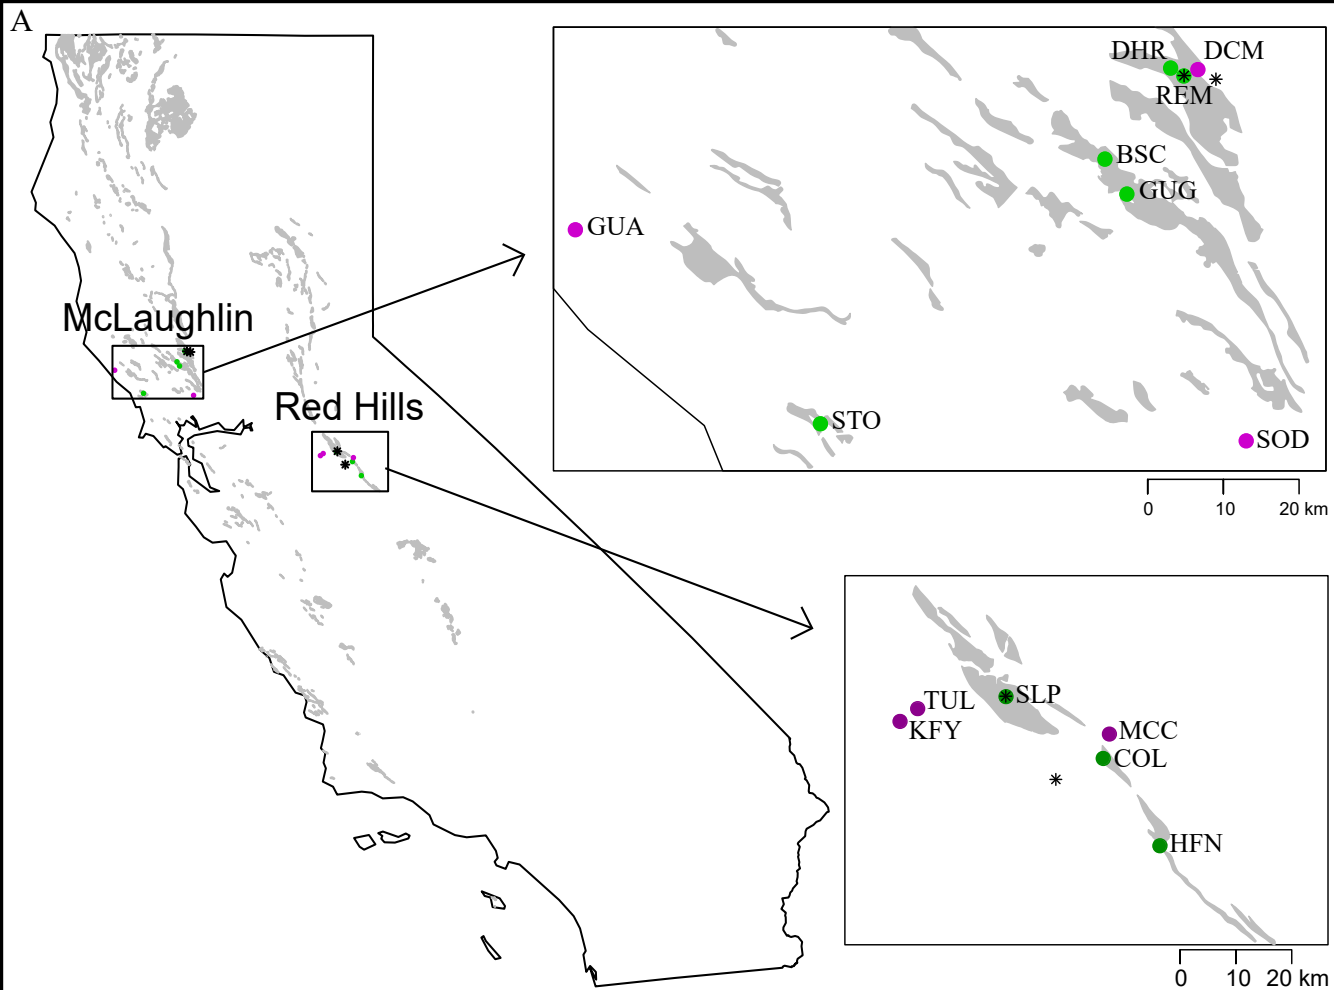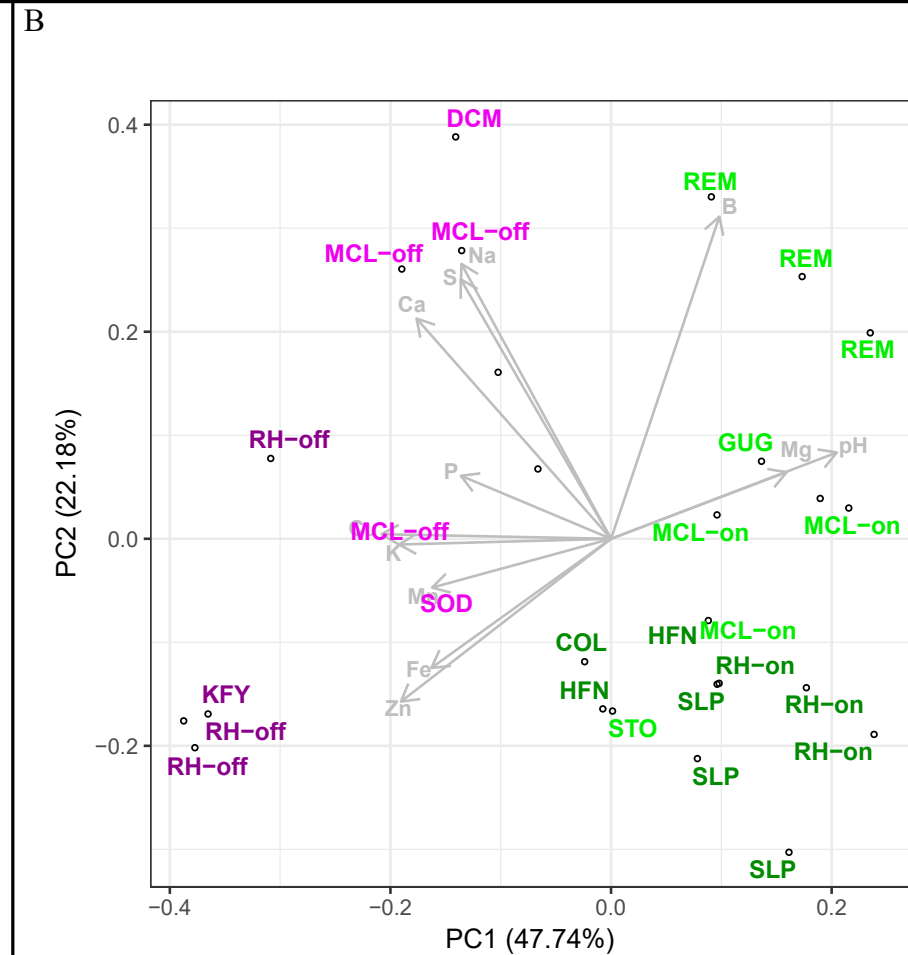

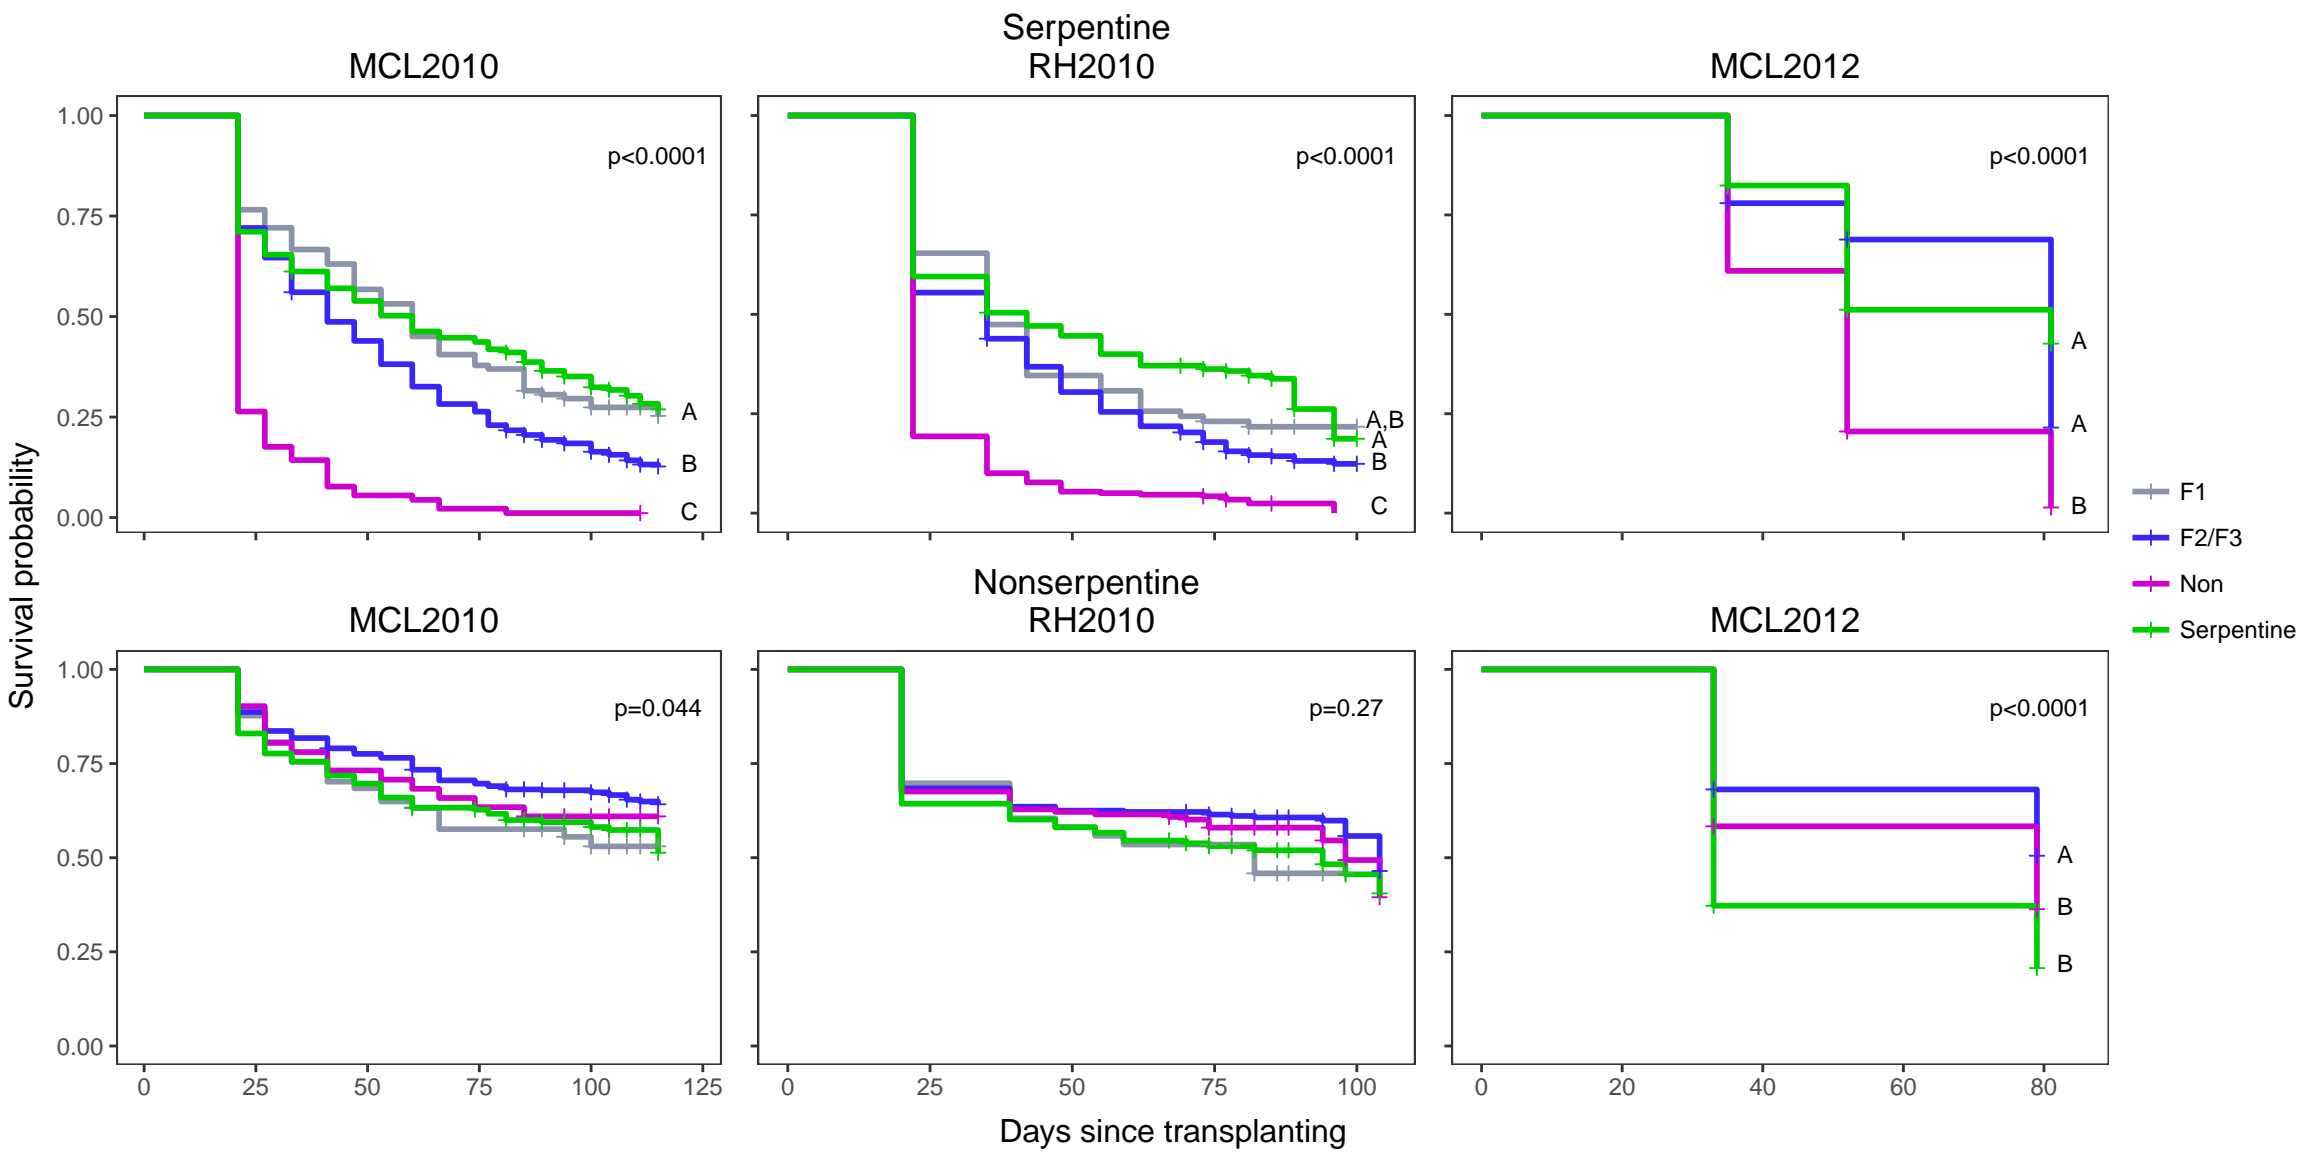

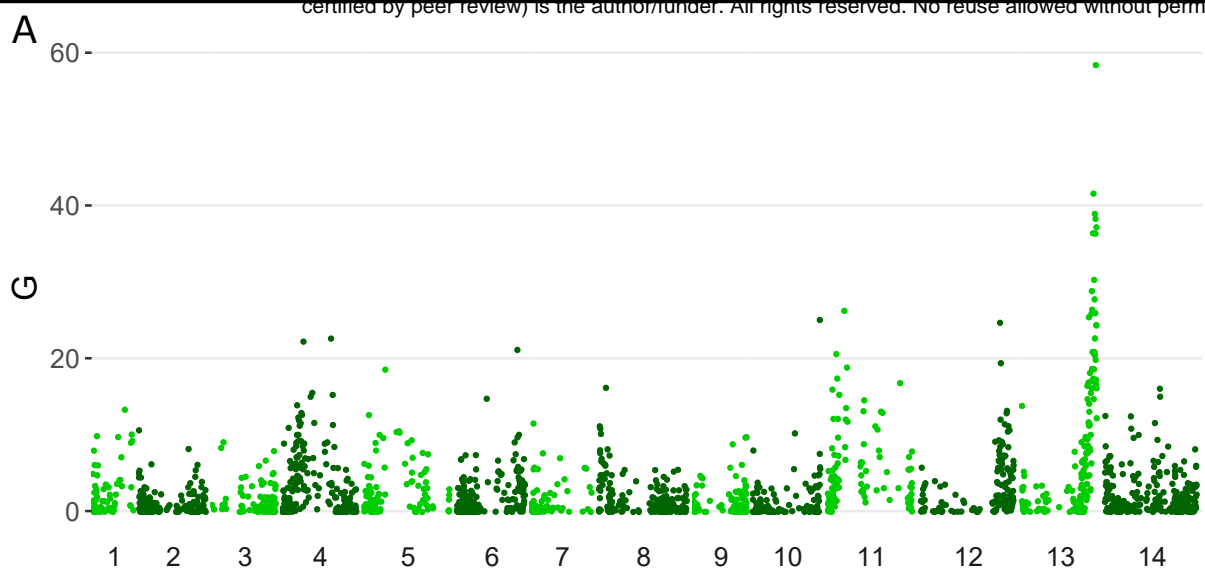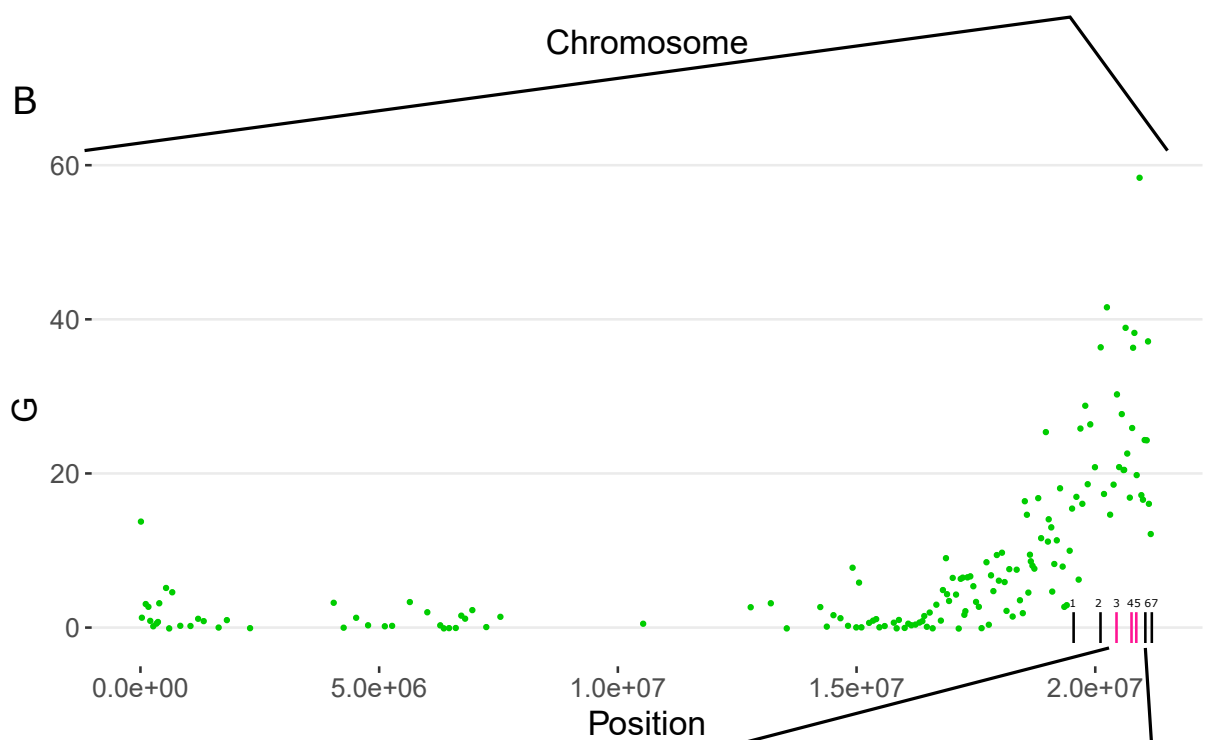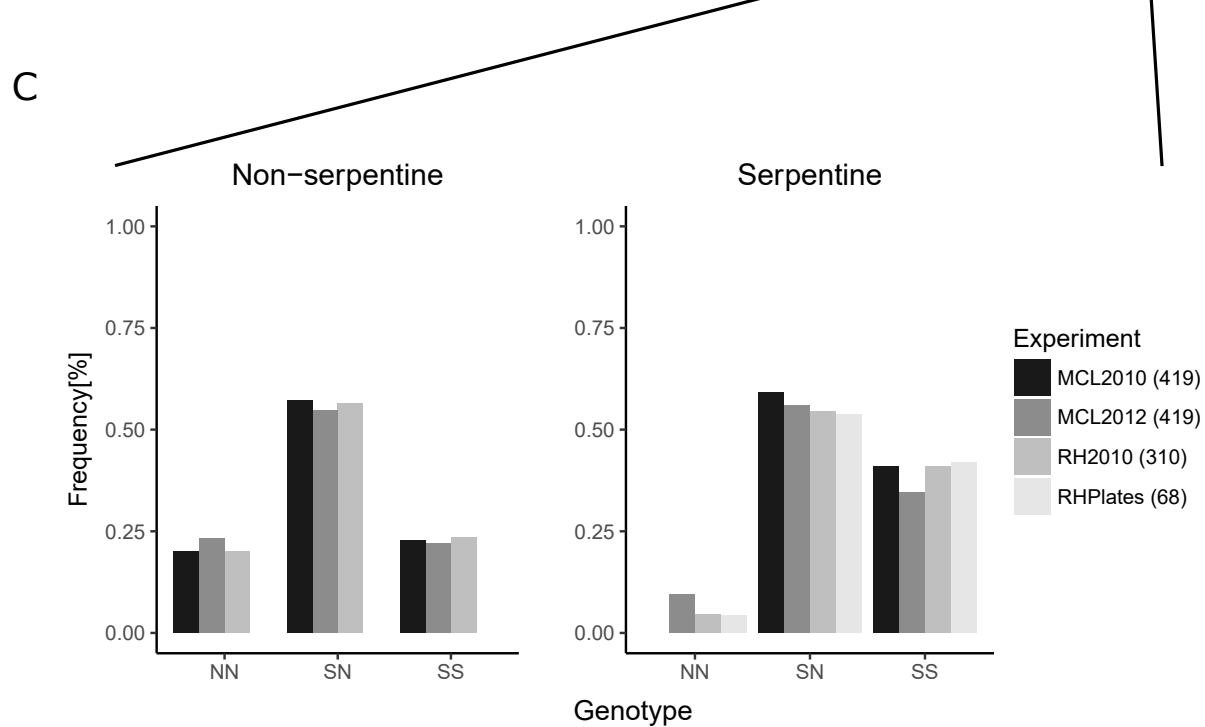



Red Hills

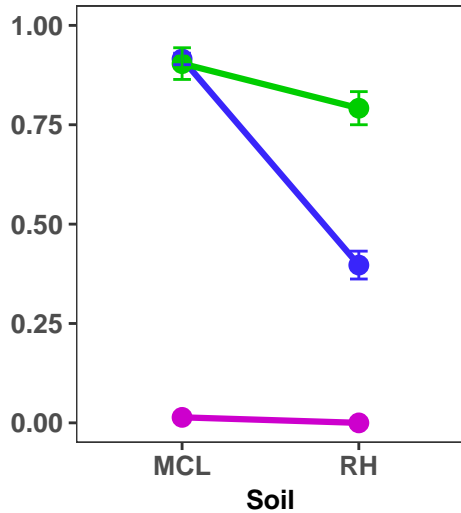

- F2 (n=40/38)
- SLP (n=6/2)
- TUL (n=6/6)

McLaughlin

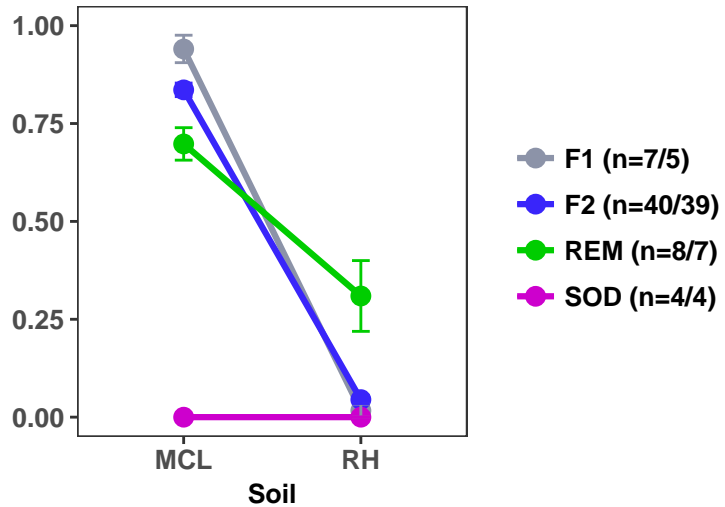

- F1 (n=7/5)
- F2 (n=40/39)
- REM (n=8/7)
- SOD (n=4/4)
